# Supplementary material for: VEXAS Syndrome in a Moroccan Patient: A Story of a Two-year Diagnostic Lag
Source: Research Square preprint supplement (doi:10.21203/rs.3.rs-4999965/v1), 2024-10-01
Supplement: Supplementary file 1 [file 9e25e16e033eb3df51f83ea3.pdf]

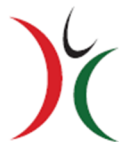

Date de l'examen : 10/12/2022

Prélevé le : 10/12/2022 à 06:17

Edité le : 15/12/2022 à 23:39

## ELECTROPHORESE

### IMMUNOFIXATION DES PROTÉINES SÉRIQUES

(Prélèvement: Sérum) (Electrophorèse/ SEBIA)

: Absence de prolifération monoclonale des gammaglobulines.

Le 15/12/2022 à 23:39

Signature

Pr. ZRARA Abdelhamid

Médecin Colonel A. ZRARA  
Spécialiste du Val de Grâce en Biologie  
Clinique Pr. A. Immunologie à la Faculté Med V  
de Médecine et de Pharmacie de Rabat  
Sec d'Hygiène et de Médecine de Collectivité  
à l'IRM

Conformément aux textes en vigueur, votre échantillon biologique pourra être éliminé, utilisé et/ou transféré à des fins scientifiques ou de contrôles qualité, hors génétique humaine, de manière anonyme et respectant le secret médical sauf opposition formulée auprès de notre secrétariat médical.

4 / 4
